# Supplementary material for: Magnetoelectric behaviour of 0–3 Co/BaTiO3 composites
Source: Royal Society of Chemistry journal article supplement (doi:10.1039/d2tc01215d), 2022-01-01
Supplement: d2tc01215d1.pdf [file d2tc01215d1.pdf]

## Supporting Information

### Magnetoelectric behavior of 0-3 Co/BaTiO<sub>3</sub>-Composites

Toni Buttler and Stefan G. Ebbinghaus\*

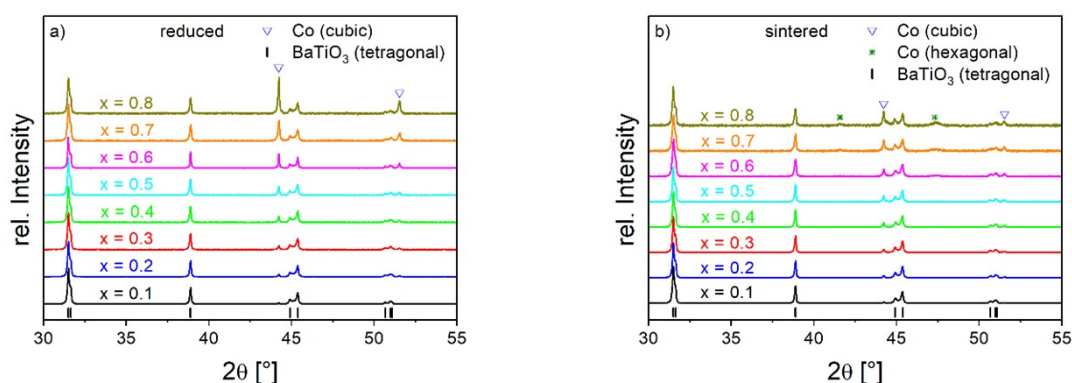

**Figure S1:** XRD patterns of all  $\text{Co}_x/(\text{BaTiO}_3)_{1-x}$  composites after reduction in forming gas at 1073 K for 2 h (a) and after sintering in nitrogen at 1623 K for 2 h with carbon as oxygen getter (b).

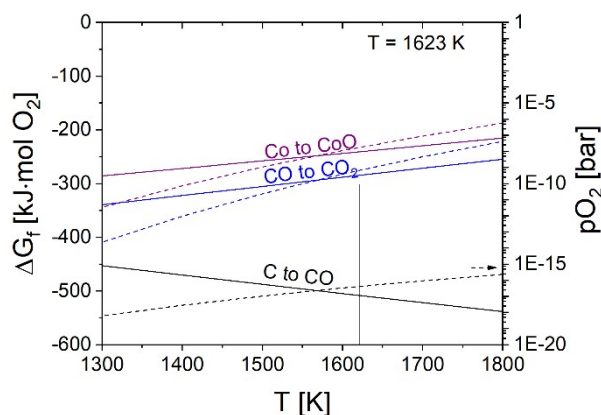

**Figure S2:** Calculated standard Gibbs free energies of oxide formation for cobalt and carbon (full lines), based on data from Barin et al.<sup>48</sup> and the corresponding equilibrium oxygen pressures (dashed lines).

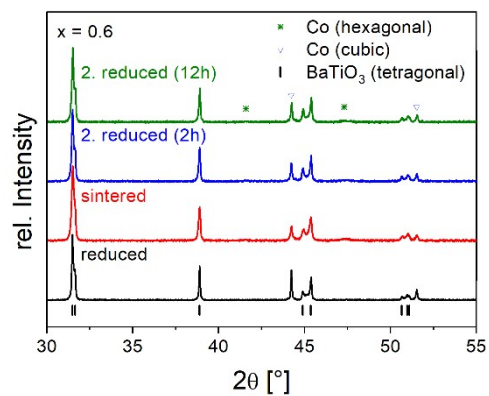

**Figure S3:** XRD patterns of  $\text{Co}_{0.6}/(\text{BaTiO}_3)_{0.4}$  after reducing in forming gas at 1073 K for 2 h, sintering in nitrogen at 1623 K for 2 h with carbon as oxygen getter and after a further reductive sintering in forming gas at 1073 K for 2 or 12 h.

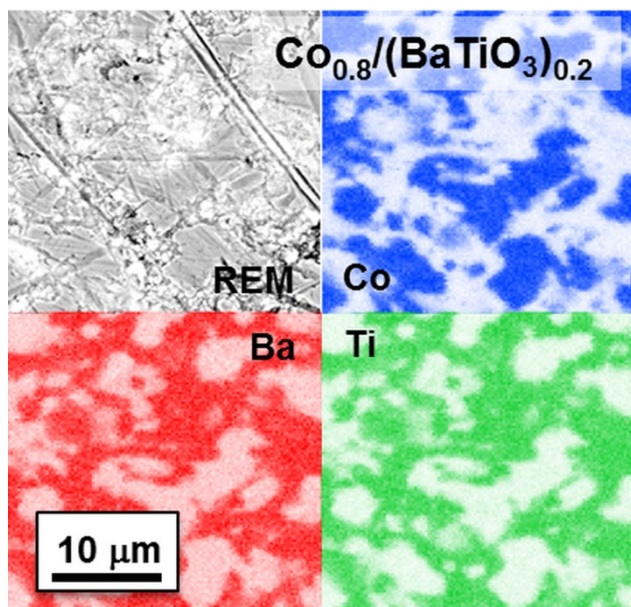

**Figure S4:** REM and EDX area scan of  $\text{Co}_{0.8}/(\text{BaTiO}_3)_{0.2}$ .

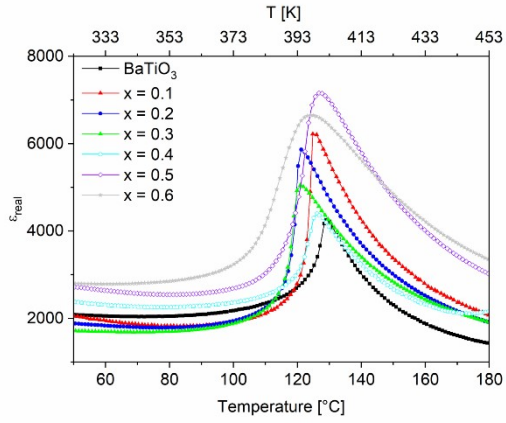

**Figure S5:** Temperature dependence of the relative permittivity of  $\text{Co}_x/(\text{BaTiO}_3)_{1-x}$  with  $x = 0.1$  to  $0.6$  measured at  $1 \text{ kHz}$ .

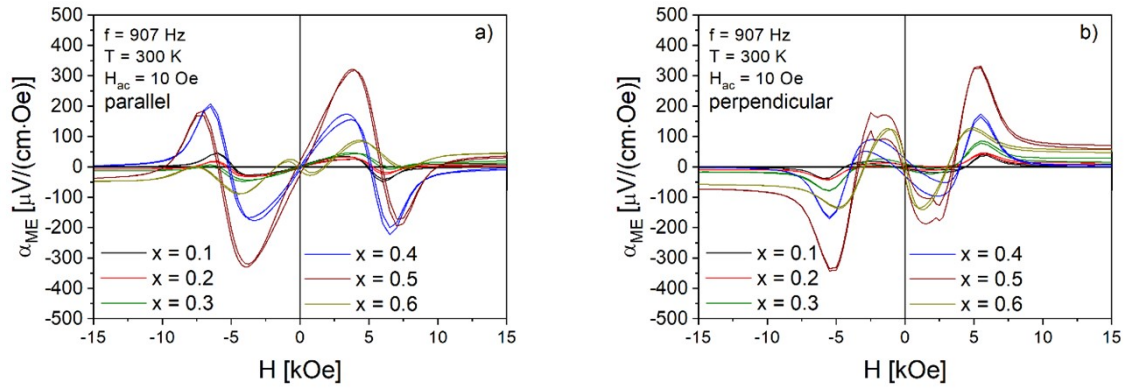

**Figure S6:** Field dependence of the magnetoelectric coefficients of the  $\text{Co}_x/(\text{BaTiO}_3)_{1-x}$  samples ( $x = 0.1$  to  $0.6$ ) for parallel (a) and perpendicular orientation (b).

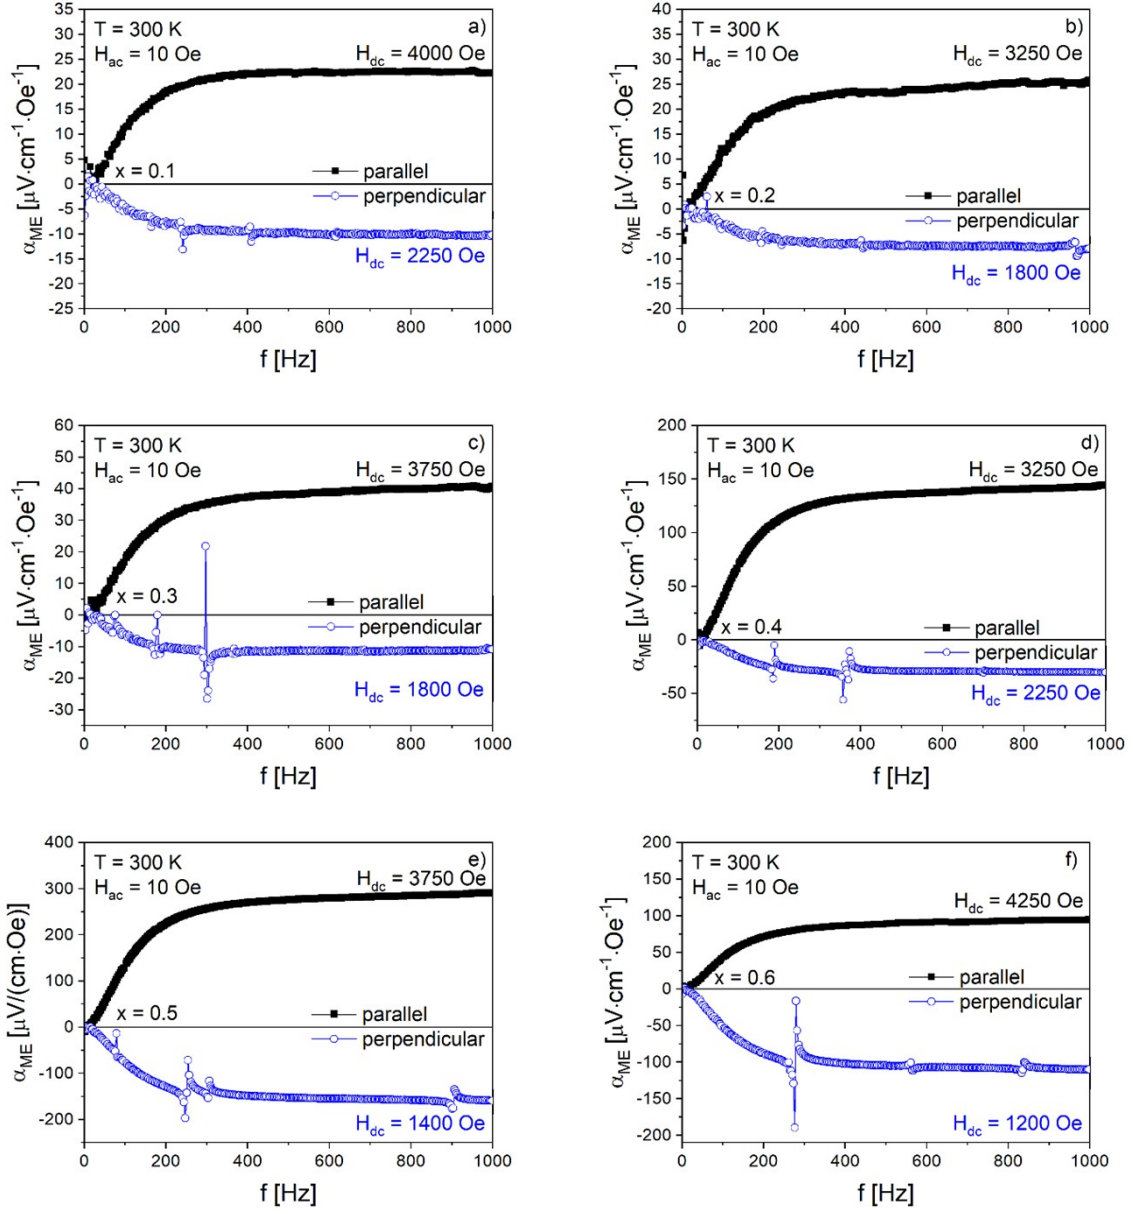

**Figure S7:** Influence of the frequency of the magnetic AC-field on  $\alpha_{ME}$  for  $\text{Co}_x/(\text{BaTiO}_3)_{1-x}$  samples with  $x = 0.1$  (a),  $0.2$  (b),  $0.3$  (c),  $0.4$  (d),  $0.5$  (e) and  $0.6$  (f) in parallel (black filled squares) and perpendicular orientation (blue open squares).

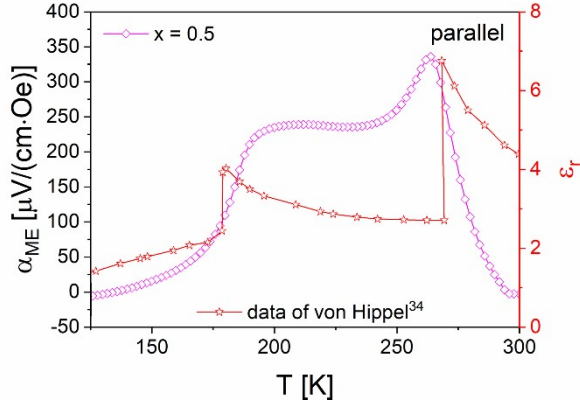

**Figure S8:** Temperature dependence of the magnetoelectric coefficient of the  $Co_{0.5}/(BaTiO_3)_{0.5}$  composite in comparison with the dielectric constant of  $BaTiO_3$  (according von Hippel<sup>34</sup>).

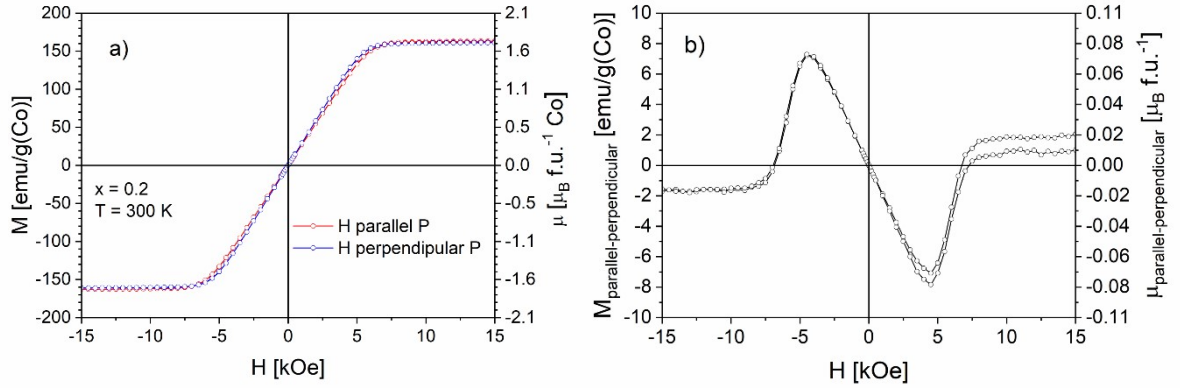

**Figure S9:** Comparison of  $M$  vs.  $H$  for an  $P||H$  and  $P \perp H$  electrically poled  $Co_{0.2}/(BaTiO_3)_{0.8}$  composite (a) and the difference between the observed magnetizations as a function of the magnetic field (b).
